# Supplementary material
Source: PubMed Central journal article supplement (PMC4613737)
Supplement: ez5b00193_si_001.pdf [file ez5b00193_si_001.pdf]

1 **Supplemental Information: Persistence of Ebola Virus in Sterilized**  
2 **Wastewater**

3  
4 **Kyle Bibby<sup>1,2\*</sup>, Robert J. Fischer<sup>3</sup>, Leonard W. Casson<sup>1</sup>, Elyse Stachler<sup>1</sup>, Charles N. Haas<sup>4</sup>,**  
5 **Vincent J. Munster<sup>3\*</sup>**

6  
7 <sup>1</sup>Department of Civil and Environmental Engineering, and <sup>2</sup>Department of Computational and  
8 Systems Biology, University of Pittsburgh, Pittsburgh, PA 15261, USA,

9 <sup>3</sup>Laboratory of Virology, Division of Intramural Research, National Institute of Allergy and  
10 Infectious Diseases, National Institutes of Health, Hamilton, MT 59840

11 <sup>4</sup>Department of Civil, Architectural & Environmental Engineering, Drexel University,  
12 Philadelphia, PA 19104, USA.

13

14

15

16 \*Corresponding Authors:

17 Kyle Bibby, Ph.D., [BibbyKJ@Pitt.edu](mailto:BibbyKJ@Pitt.edu), 412-624-9207

18 Vincent Munster, Ph.D., [munstervj@niaid.nih.gov](mailto:munstervj@niaid.nih.gov), 406-375-7489

19

20

21 **Keywords:** Ebola virus, Ebola, *Filoviridae*, enveloped virus, water, wastewater

22

23

24  
25  
26

---

**Table S1.** Recorded TCID<sub>50</sub> values and standard deviations of Ebola virus spiked into sterilized domestic wastewater.

---

| Day | TCID <sub>50</sub> | Standard Deviation |
|-----|--------------------|--------------------|
| 0   | 708000             | 252879             |
| 1   | 7120               | 9249               |
| 2   | 14920              | 14845              |
| 3   | 11140              | 6170               |
| 4   | 7080               | 2529               |
| 5   | 3980               | 1420               |
| 6   | 854                | 253                |
| 7   | 562                | 0                  |
| 8   | 316                | 0                  |

---

27
